# Supplementary material for: Rainfall retrievals over West Africa using SEVIRI: evaluation with TRMM-PR and monitoring of the daylight time monsoon progression
Source: Copernicus journal article supplement (doi:10.5194/hessd-7-6351-2010), 2010-08-27
Supplement: Supplementary file 1 [file FigS1_all.pdf › FigS1_all.pdf]

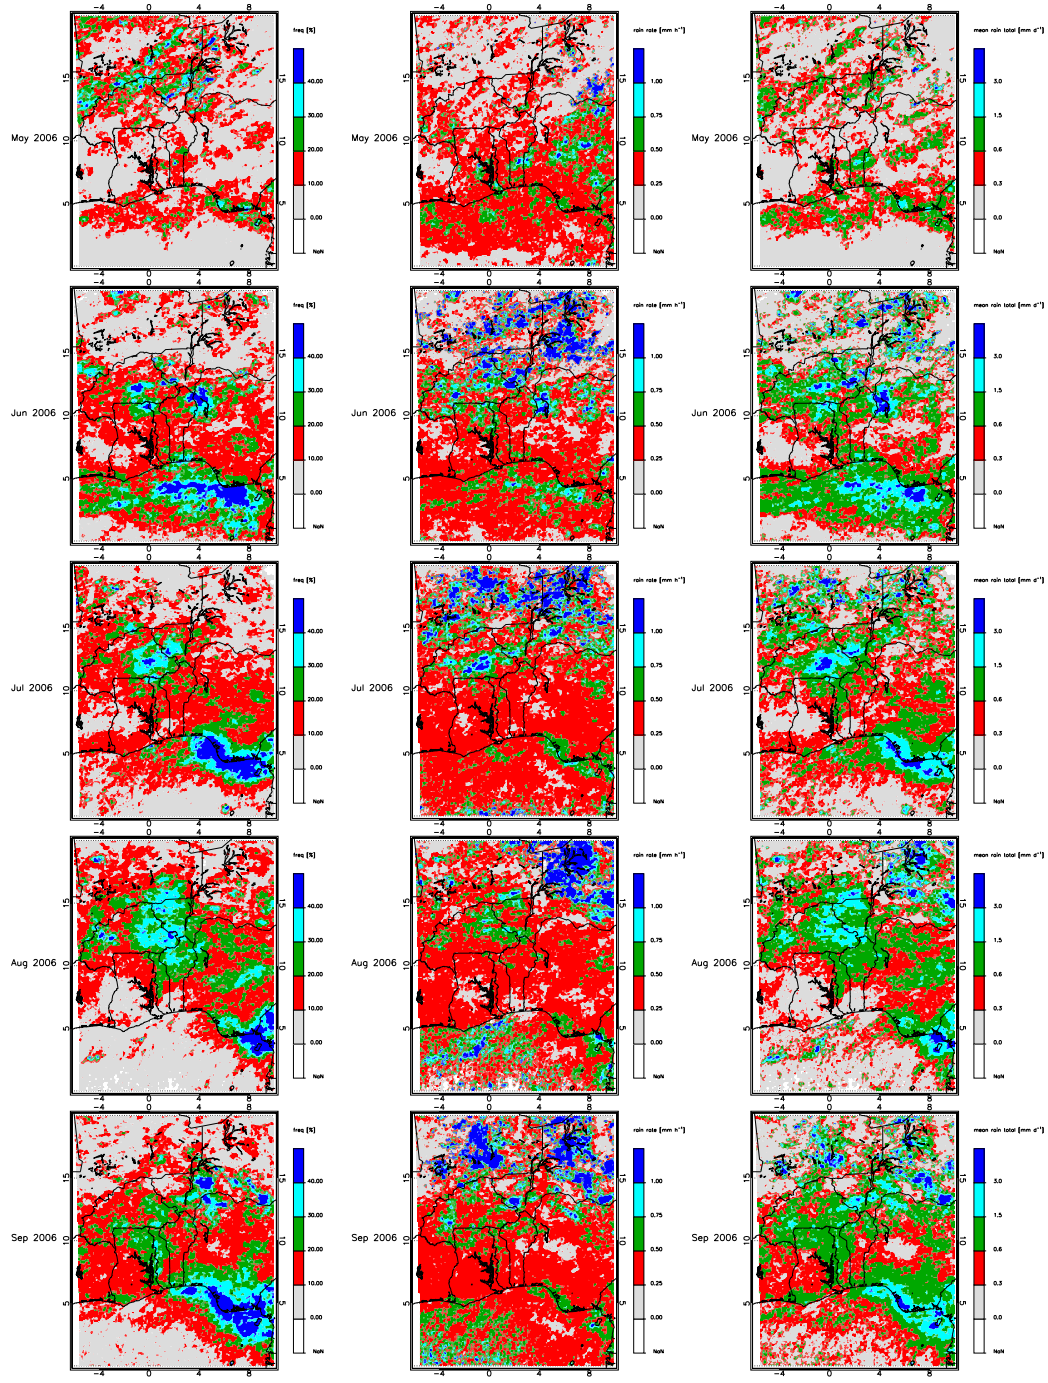

**Figure S1:** (Left) Mean daytime (07:30-16:30 UTC) rain occurrence frequency, (middle) mean daytime rain rate, and (right) mean daytime rain totals for 0°-20°N, 6°W-10°E, May through September 2006.
