# Supplementary material for: Rainfall retrievals over West Africa using SEVIRI: evaluation with TRMM-PR and monitoring of the daylight time monsoon progression
Source: Copernicus journal article supplement (doi:10.5194/hessd-7-6351-2010), 2010-08-27
Supplement: Supplementary file 2 [file FigS2_all.pdf › FigS2_all.pdf]

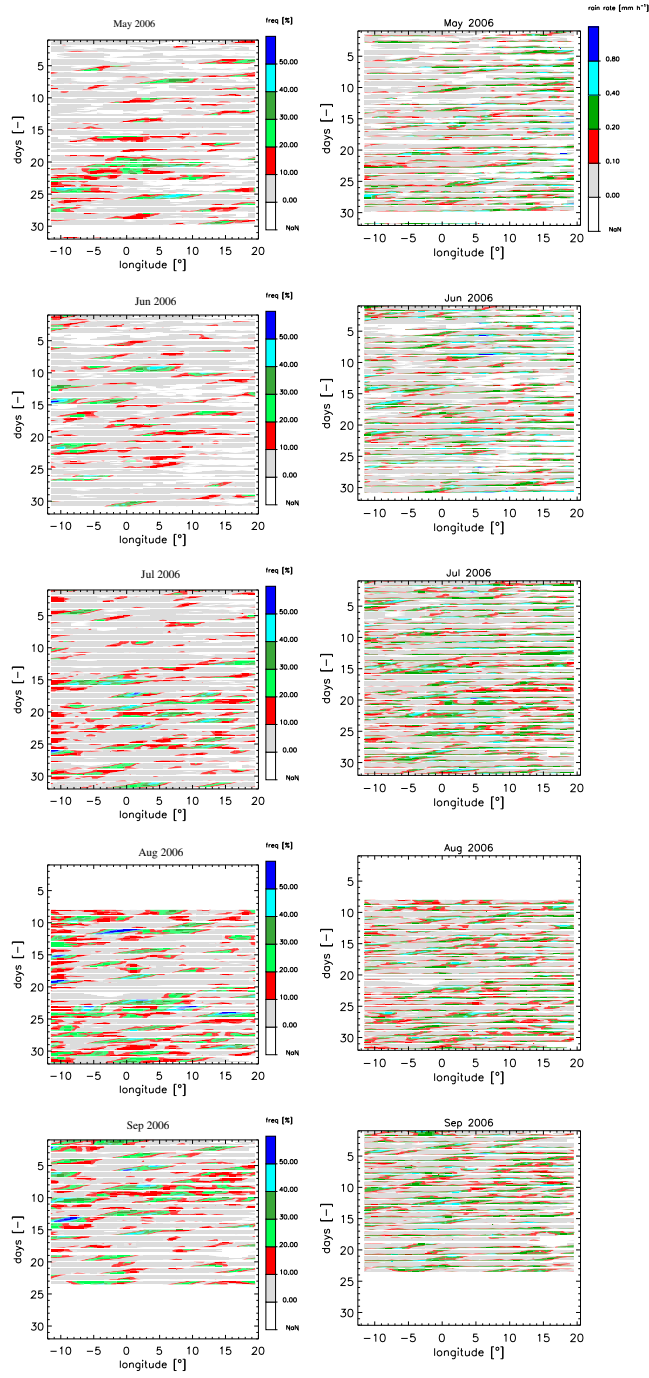

**Fig S2.** Longitudinal Hovmöller diagrams of (left) daytime rain frequency (in %) and (right) rain rate. Values have been calculated from 15-minute SEVIRI observations aggregated over 1-h periods. White horizontal lines denote the nighttime periods.
